# Supplementary material
Source: PubMed Central journal article supplement (PMC2043570)

Figure S1 (Halbleib et al.)

A

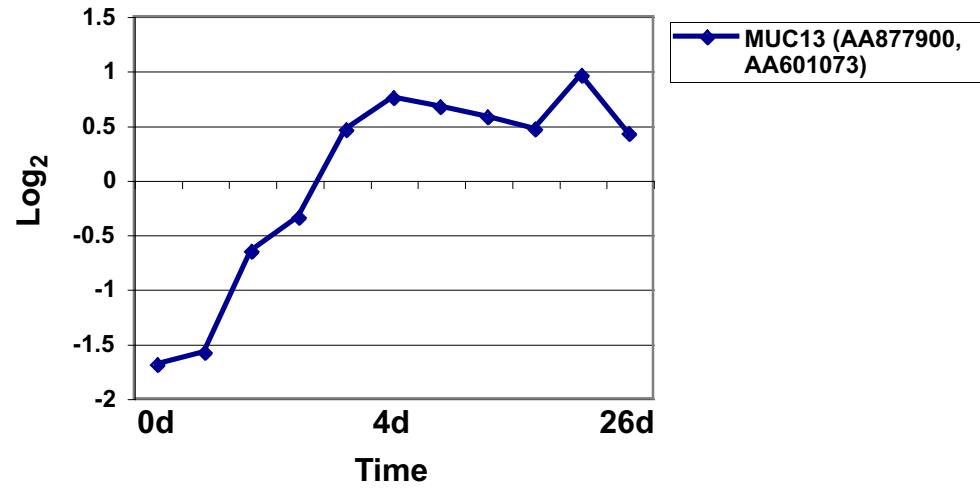

B

Muc13  
Sense  
Probe

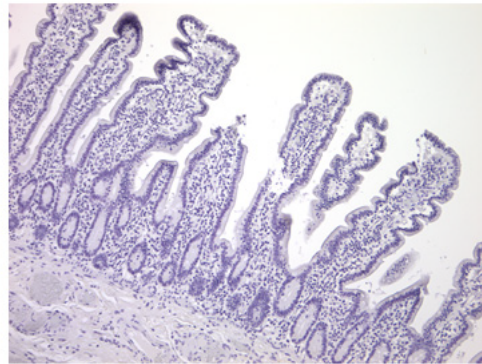

Muc13  
Anti-sense  
Probe

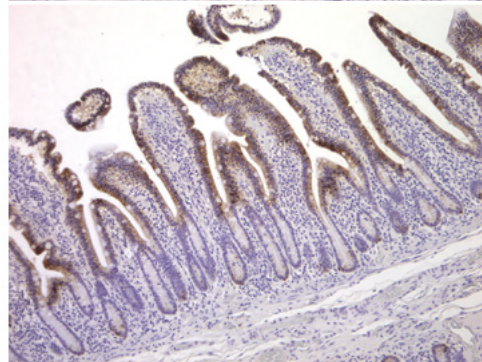

Supplement: mbc_E07-04-0308_1.pdf [file mbc_E07-04-0308_1.pdf]
